# Supplementary material
Source: PubMed Central journal article supplement (PMC5576786)
Supplement: pnas.1702586114.sapp.pdf [file pnas.1702586114.sapp.pdf]

**Table of Contents**

Fig. S1. Cranial and mandibular landmarks..... 2

Fig. S2. Milk model diet effects, 3D shape..... 3

Fig. S3. All diet effects, cranial shape..... 4

Fig. S4. All diet effects, mandibular shape..... 5

Fig. S5. Dental shape contrasts, Soft and Mush models..... 6

Fig. S6. Milk model maxillary dentition contrast, 3D shape..... 7

Fig. S7. Milk model mean contrasts, 3D form..... 8

Fig. S8. Effect magnitude comparison, shape space..... 9

Table S1. Relationship matrix..... 10

Document S1. Sample overview..... 11

References..... 17

**Fig. S1.** Cranial and mandibular landmarks. Starred ("\*") landmarks are midline landmarks. All other landmarks are bilateral. While landmark data collection was bilateral, all analysis was performed on averaged hemiforms as a means to accommodate missing data. See Materials & Methods for details.

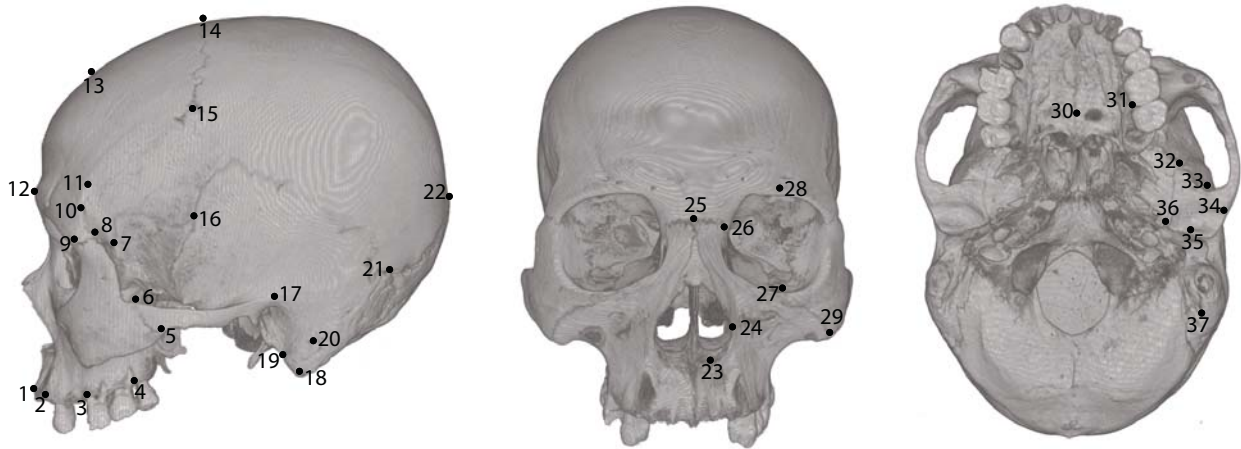

**Cranial landmarks.** 1 prosthion\*; 2 external incisor margin; 3 premolar-molar margin; 4 M2-M3 margin (buccal); 5 zygotemporal inferior; 6 zygotemporal superior; 7 frontosphenomolare; 8 frontomalare temporale; 9 frontomalare orbitale; 10 temporalis anterior; 11 frontotemporale; 12 glabella\*; 13 maximum glabella-bregma subtense\*; 14 bregma\*; 15 stephanion; 16 krotaphion; 17 radiculare; 18 inferior mastoid process; 19 anterior mastoid process; 20 lateral mastoid process; 21 asterion; 22 lambda\*; 23 inferior nasal aperture; 24 alare; 25 nasion\*; 26 nasomaxillare; 27 zygoorbitale; 28 orbital superior; 29 zygomaxillare; 30 palatomaxillary suture\*; 31 M1-M2 margin (lingual); 32 sphenosquamosal suture; 33 temporal foramen posterior; 34 lateral mandibular fossa; 35 posterior mandibular fossa; 36 stenion; 37 posterior digastric groove.

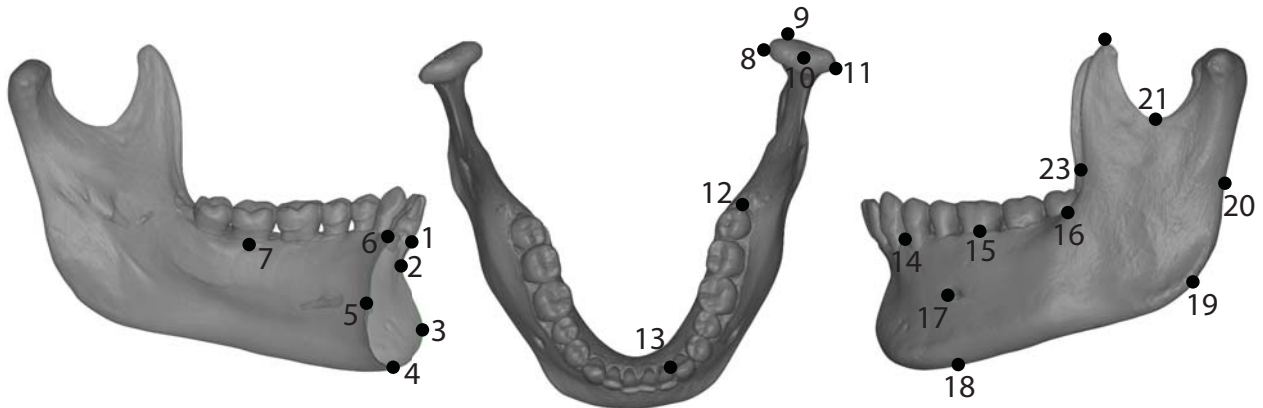

**Mandibular landmarks.** 1 infradentale\*; 2 incurvatio mandibularis\*; 3 mental eminence\*; 4 gnathion\*; 5 mental spine\*; 6 mandibular orale\*; 7 lingual M2; 8 medial condyle; 9 posterior condyle; 10 condyle tip; 11 lateral condyle; 12 posterior molar; 13 I-C margin; 14 C-P3 margin; 15 buccal M1; 16 oblique line; 17 mental foramen; 18 inferior ramus; 19 gonion; 20 posterior ramus; 21 mandibular notch; 22 coronion; 23 anterior ramus.

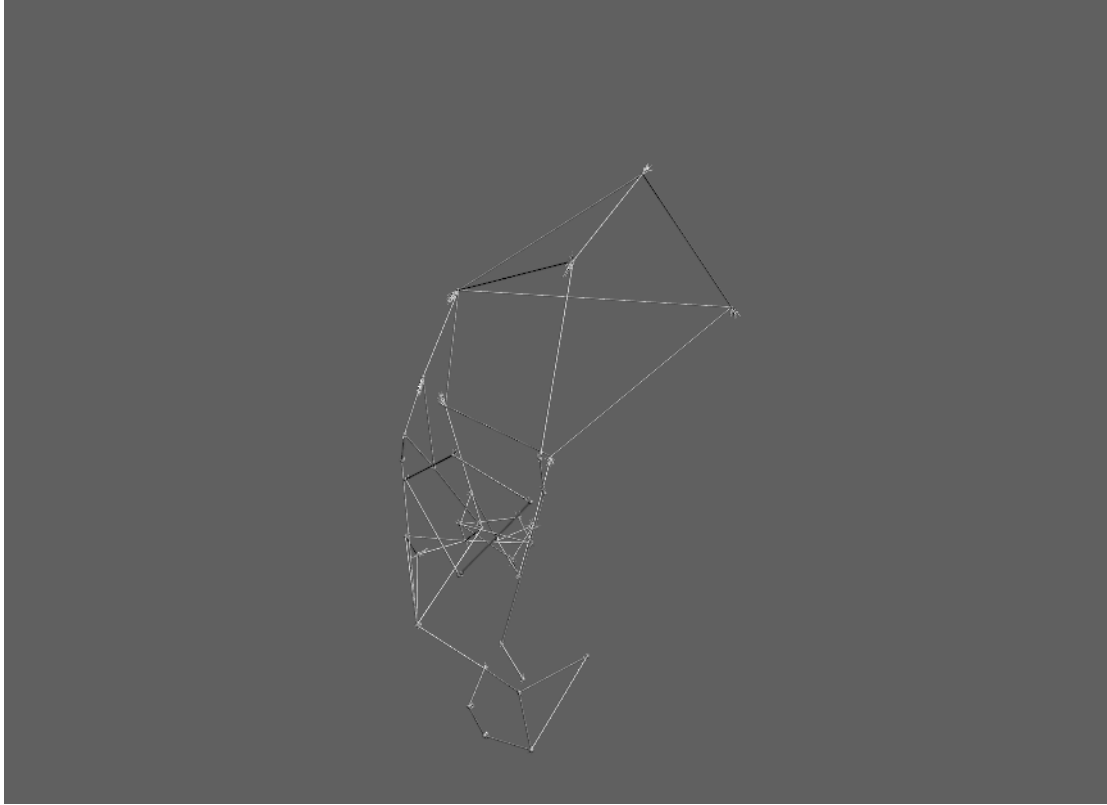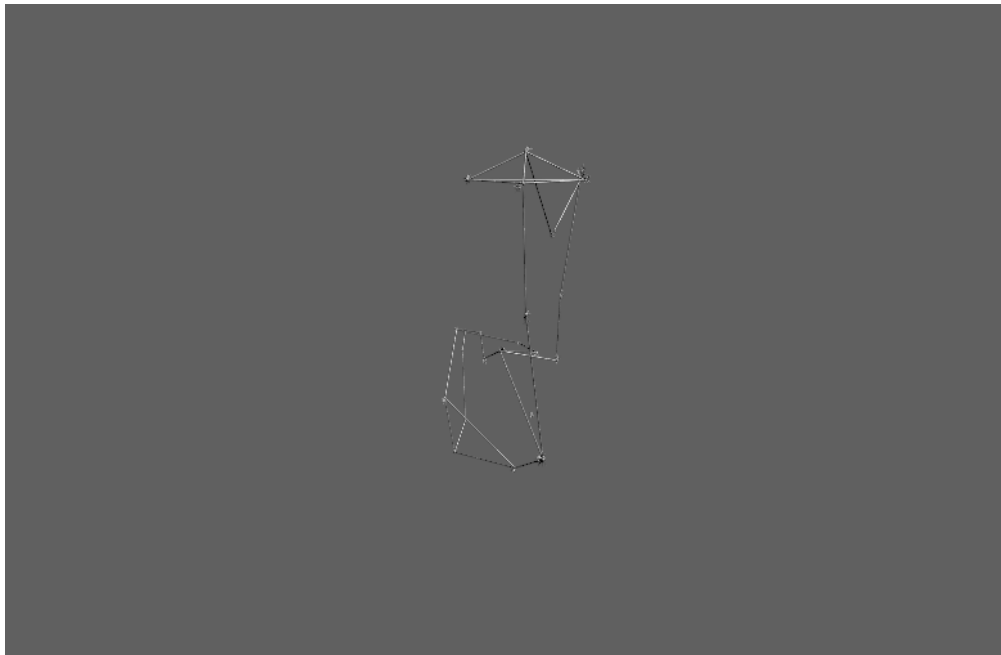

**Fig. S2.** Milk model diet effects, 3D shape. Landmark displacement vectors depict 50 realizations of the expected shape transformation across the agricultural transition, sampled with replacement from the posterior.

Wireframe and displacement vector thickness has been optimized for viewing in full screen mode. After activating scene, right click to select the full screen viewing option.

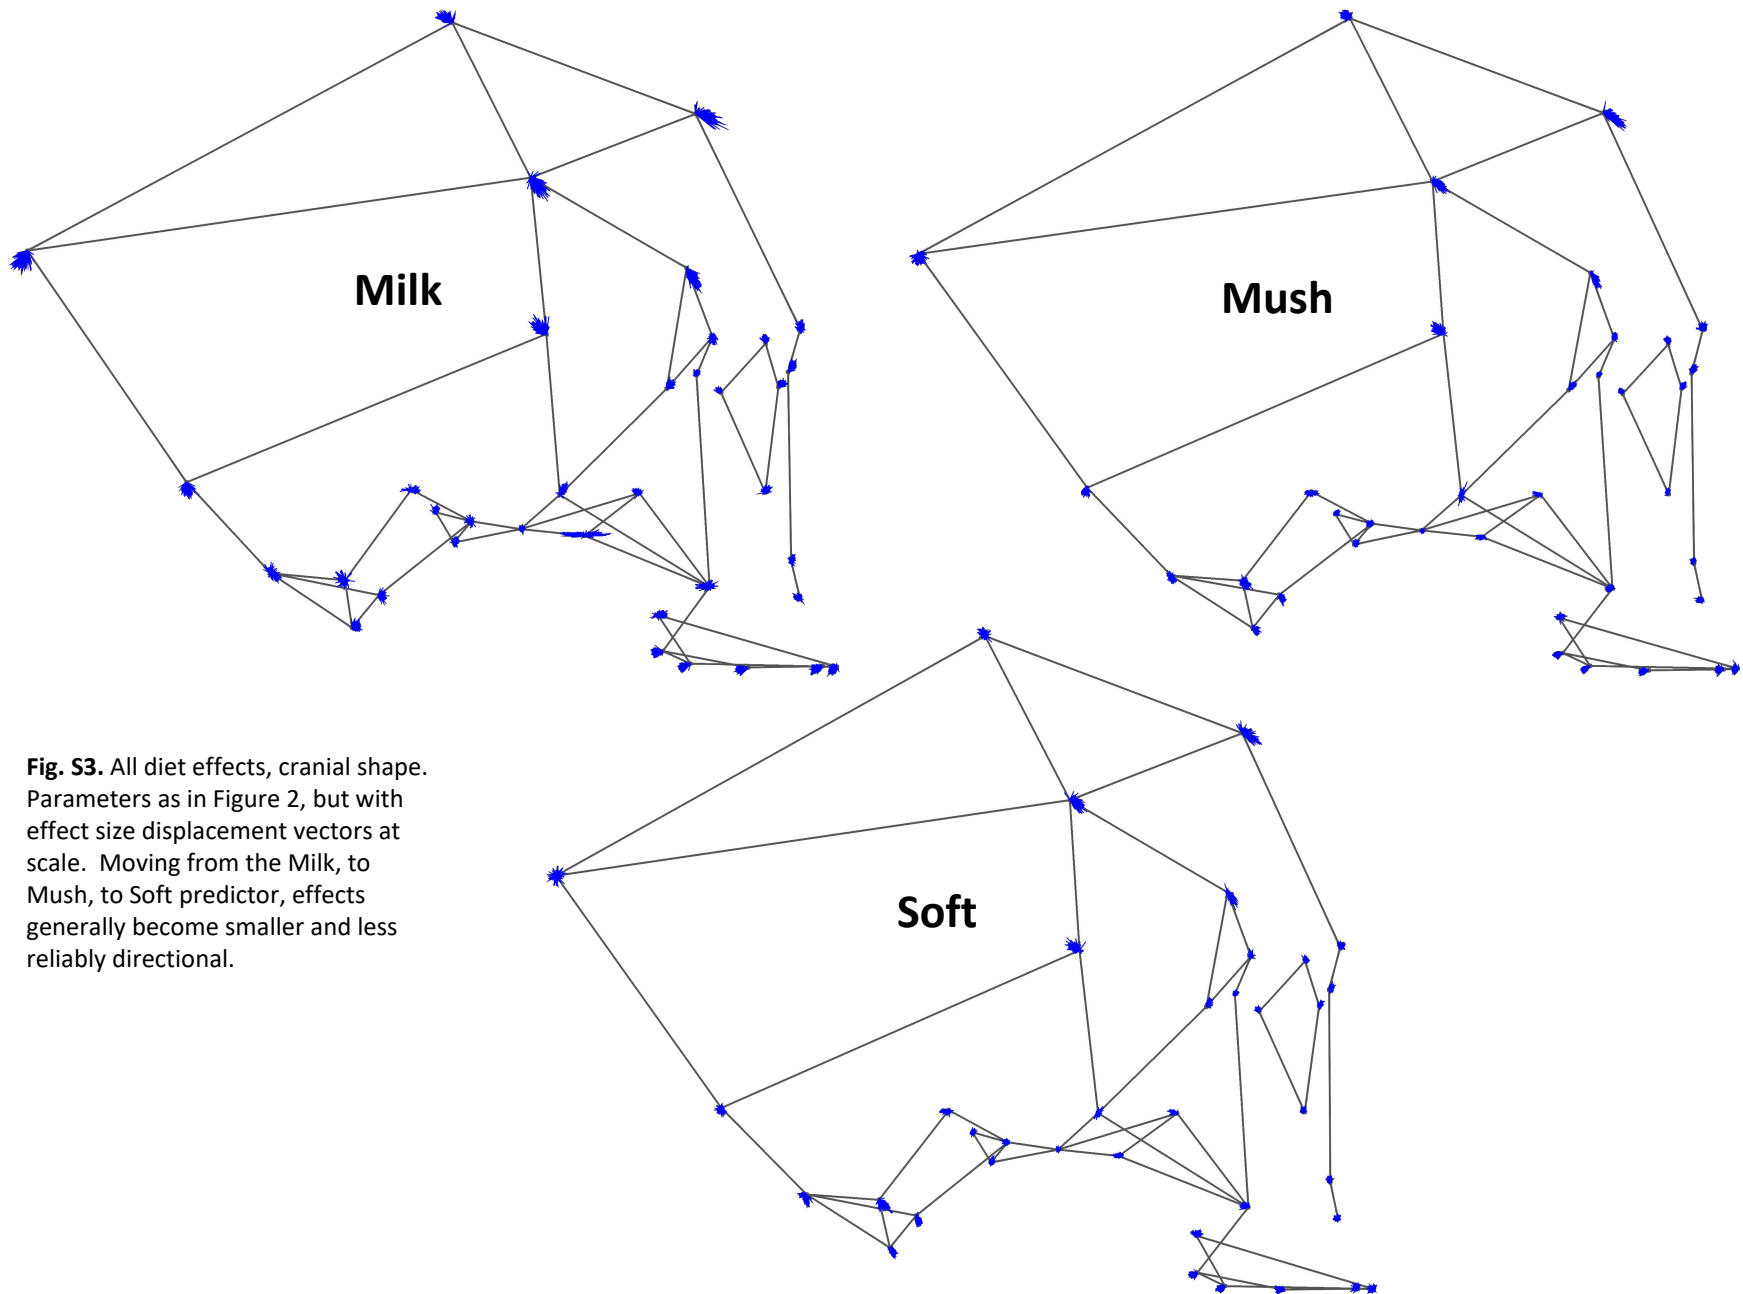

**Fig. S3.** All diet effects, cranial shape. Parameters as in Figure 2, but with effect size displacement vectors at scale. Moving from the Milk, to Mush, to Soft predictor, effects generally become smaller and less reliably directional.

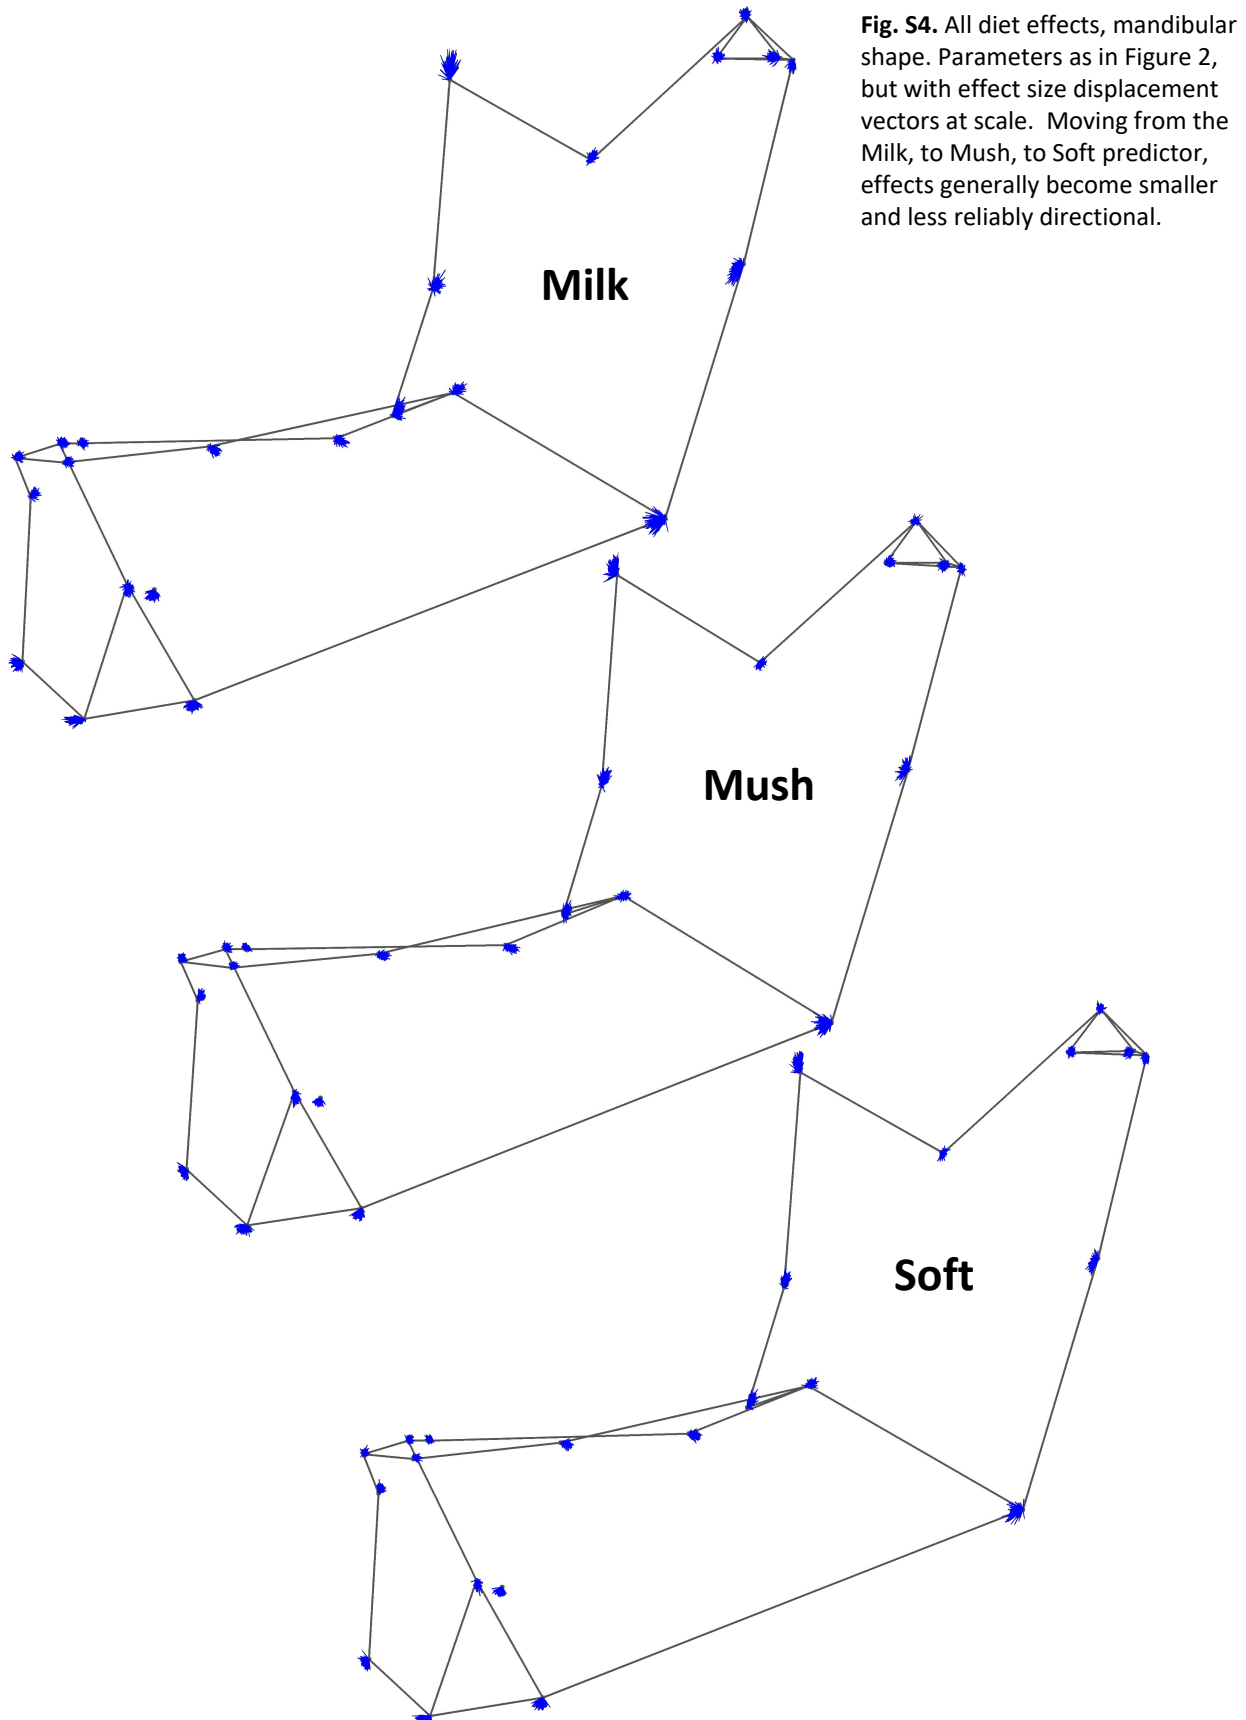

**Fig. S4.** All diet effects, mandibular shape. Parameters as in Figure 2, but with effect size displacement vectors at scale. Moving from the Milk, to Mush, to Soft predictor, effects generally become smaller and less reliably directional.

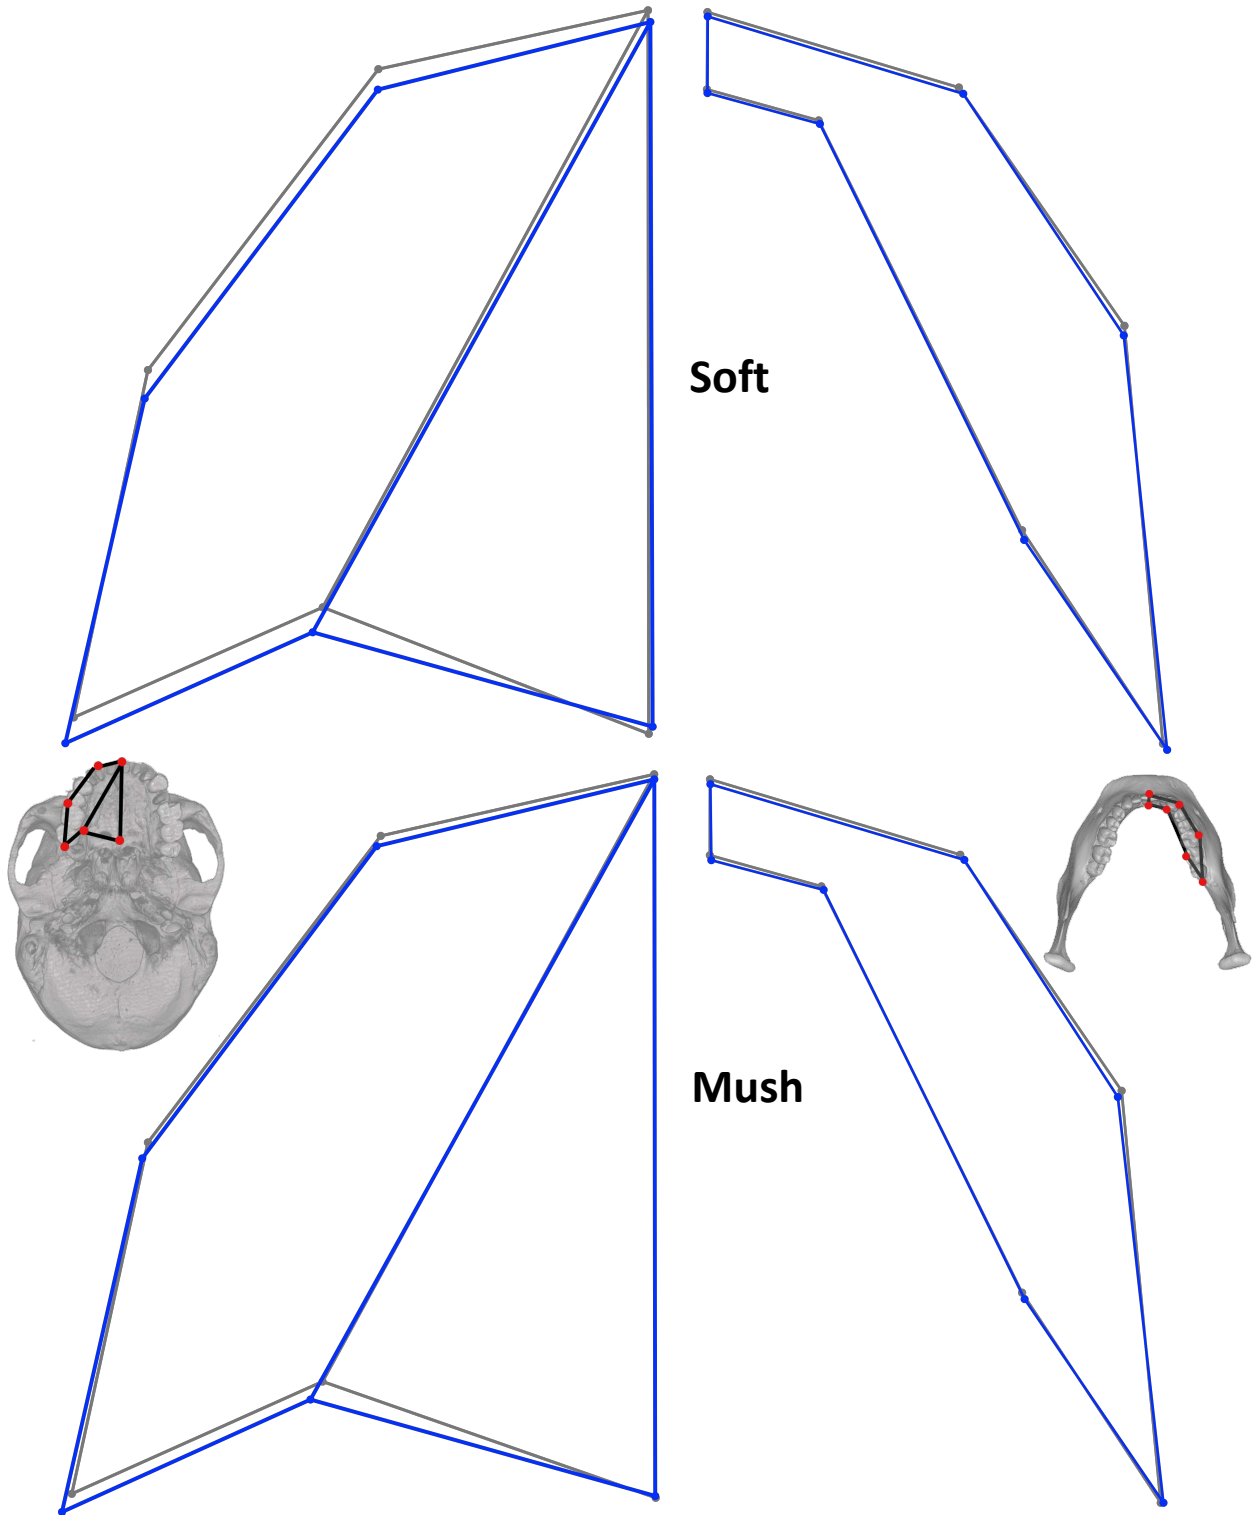

Fig. S5. Dental shape contrasts, Soft and Mush models. The reference shape is in gray; diet effect in blue.

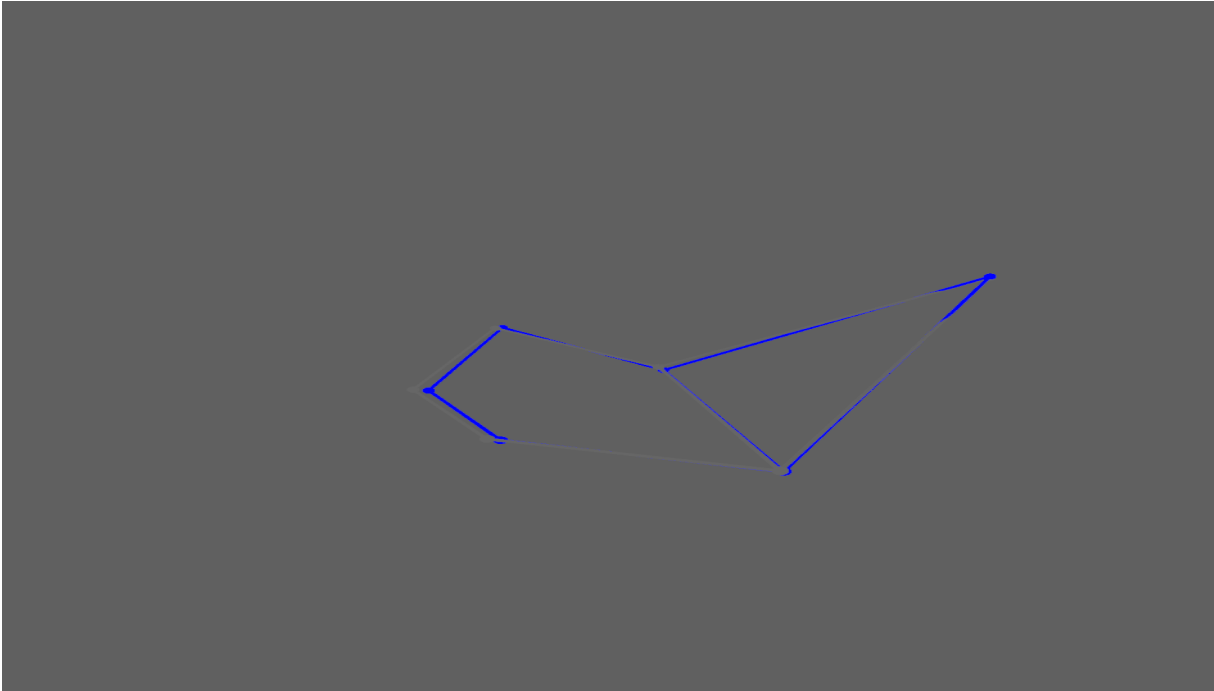

**Fig. S6.** Milk model maxillary dentition shape contrast, 3D. Reference (harder diet) configuration in gray; diet effect in blue. Wireframe and displacement vector thickness has been optimized for viewing in full screen mode. After activating scene, right click to select the full screen viewing option.

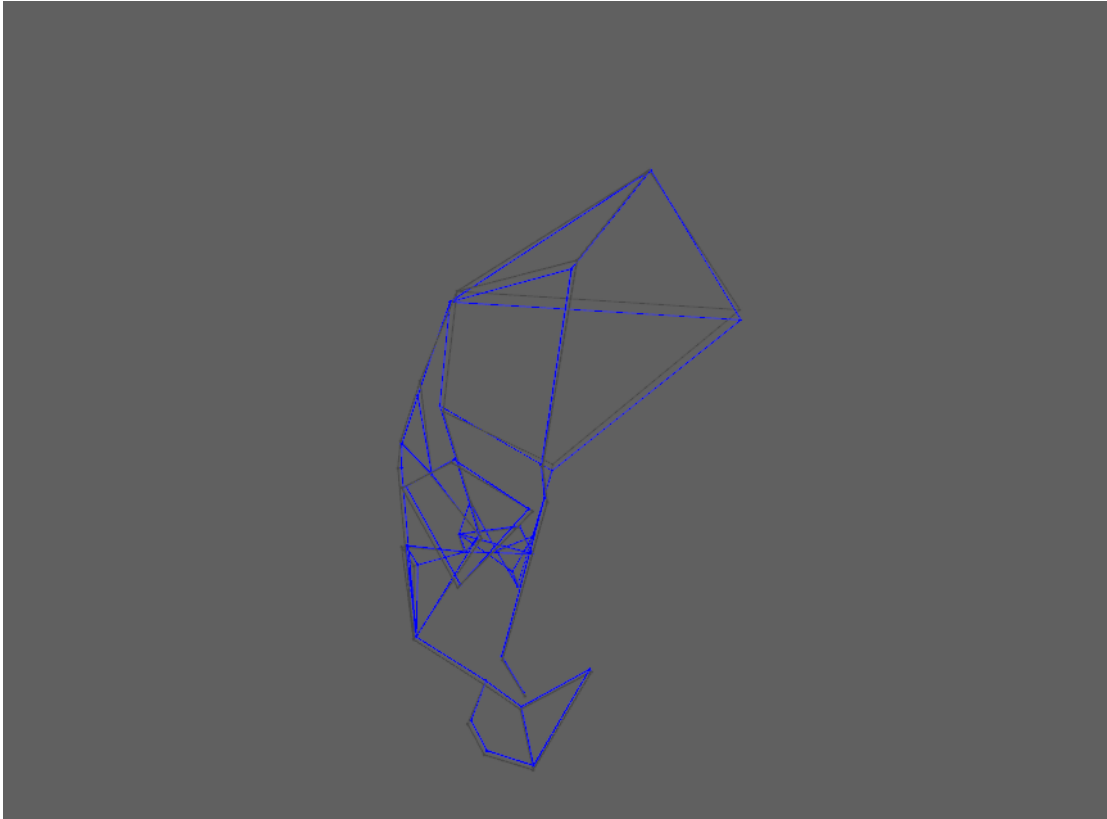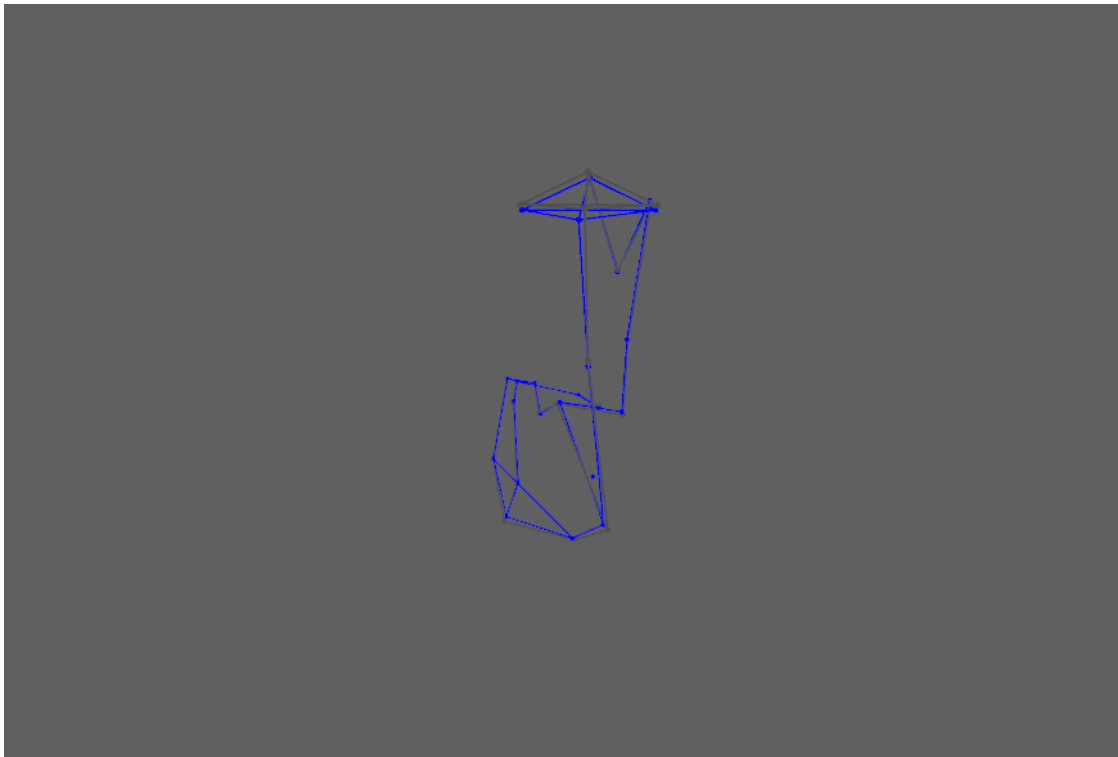

**Fig. S7.** Milk model mean contrasts, 3D form. After activating scene, right click to select the full screen viewing option. Reference (harder diet) in gray; diet effect in blue.



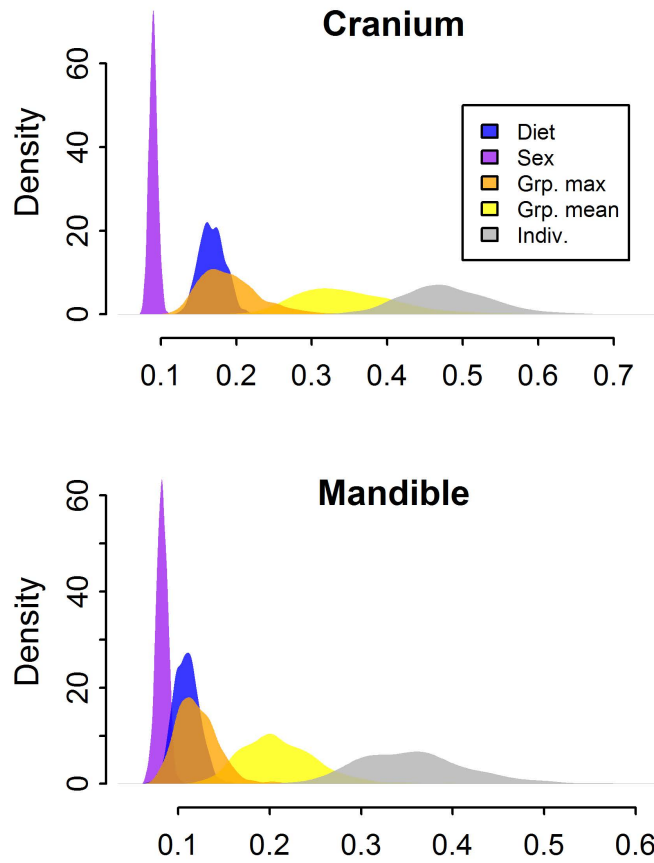

**Fig. S8.** Effect magnitude comparison, shape space. Densities are distributions of pairwise Euclidean distances for the Milk diet contrast, sex contrast, the contrast between two groups of average relatedness (approximately 0.5 for both the cranium and mandible) and between two groups of maximum relatedness (approximately 0.84), and the contrast between a pair of unrelated individuals from the same group. Each posterior sample contributes one contrast to each density.

SI APPENDIX

|      |      |       |       |       |       |       |       |       |       |       |       |       |       |       |       |       |       |       |       |       |       |       |       |       |       |       |
|------|------|-------|-------|-------|-------|-------|-------|-------|-------|-------|-------|-------|-------|-------|-------|-------|-------|-------|-------|-------|-------|-------|-------|-------|-------|-------|
| AI   | 1    | 11.26 | 16.02 | 24.08 | 11.94 | 8.88  | 12.24 | 11.98 | 13.17 | 15.37 | 8.34  | 8.64  | 17.52 | 17.04 | 7.9   | 11.91 | 12.26 | 17.02 | 15.56 | 10.31 | 10.68 | 22.83 | 10.09 | 14.98 | 24.93 | 5.93  |
| AUS  | 0.63 | 1     | 21.24 | 29.31 | 18.44 | 13.74 | 18.74 | 18.48 | 19.79 | 21.99 | 14.86 | 13.5  | 22.75 | 22.26 | 13.44 | 18.52 | 18.87 | 22.25 | 20.79 | 16.93 | 17.29 | 28.05 | 7.64  | 21.59 | 30.16 | 11.02 |
| BIII | 0.48 | 0.31  | 1     | 12.62 | 17.33 | 12.42 | 17.63 | 17.36 | 19.74 | 21.93 | 15.41 | 12.58 | 7.93  | 6.24  | 12.75 | 18.47 | 18.82 | 6.07  | 5.54  | 16.87 | 17.24 | 11.37 | 20.08 | 21.54 | 13.47 | 14.82 |
| CHU  | 0.22 | 0.05  | 0.59  | 1     | 25.39 | 20.49 | 25.69 | 25.43 | 27.8  | 30    | 23.48 | 20.64 | 15.06 | 12.97 | 20.81 | 26.53 | 26.88 | 12.73 | 13.29 | 24.94 | 25.3  | 6.19  | 28.14 | 29.6  | 5.6   | 22.89 |
| DN   | 0.61 | 0.4   | 0.44  | 0.18  | 1     | 13.58 | 5.46  | 5.54  | 10.55 | 12.75 | 8.14  | 13.44 | 18.83 | 18.34 | 11.15 | 9.28  | 9.63  | 18.33 | 16.87 | 7.69  | 8.05  | 24.13 | 17.28 | 12.35 | 26.24 | 12.37 |
| EDO  | 0.71 | 0.55  | 0.6   | 0.34  | 0.56  | 1     | 13.88 | 13.62 | 15.58 | 17.77 | 10.56 | 4.79  | 13.93 | 13.44 | 7     | 14.31 | 14.66 | 13.42 | 11.96 | 12.71 | 13.08 | 19.23 | 12.57 | 17.38 | 21.34 | 7.51  |
| FM   | 0.6  | 0.39  | 0.43  | 0.17  | 0.82  | 0.55  | 1     | 4.88  | 10.85 | 13.05 | 8.44  | 13.74 | 19.13 | 18.64 | 11.45 | 9.58  | 9.93  | 18.63 | 17.17 | 7.99  | 8.35  | 24.44 | 17.58 | 12.65 | 26.54 | 12.67 |
| FN   | 0.61 | 0.4   | 0.44  | 0.18  | 0.82  | 0.56  | 0.84  | 1     | 10.59 | 12.79 | 8.18  | 13.48 | 18.87 | 18.38 | 11.19 | 9.32  | 9.67  | 18.37 | 16.91 | 7.73  | 8.09  | 24.17 | 17.32 | 12.39 | 26.28 | 12.41 |
| PAH  | 0.57 | 0.36  | 0.36  | 0.1   | 0.66  | 0.49  | 0.65  | 0.66  | 1     | 7.26  | 9.63  | 15.4  | 21.24 | 20.75 | 13.12 | 7.7   | 7.9   | 20.74 | 19.28 | 7.61  | 7.25  | 26.54 | 18.63 | 6.96  | 28.65 | 13.88 |
| KHOI | 0.5  | 0.29  | 0.29  | 0.03  | 0.59  | 0.42  | 0.58  | 0.59  | 0.76  | 1     | 11.83 | 17.6  | 23.43 | 22.95 | 15.32 | 10.4  | 10.62 | 22.93 | 21.47 | 9.68  | 9.27  | 28.74 | 20.82 | 4.94  | 30.84 | 16.07 |
| IRAN | 0.73 | 0.52  | 0.5   | 0.24  | 0.74  | 0.66  | 0.73  | 0.73  | 0.69  | 0.62  | 1     | 10.37 | 16.92 | 16.43 | 8.14  | 8.37  | 8.71  | 16.42 | 14.96 | 6.77  | 7.14  | 22.22 | 13.69 | 11.44 | 24.33 | 8.84  |
| JOM  | 0.72 | 0.56  | 0.59  | 0.33  | 0.56  | 0.84  | 0.55  | 0.56  | 0.5   | 0.43  | 0.66  | 1     | 14.08 | 13.59 | 6.84  | 14.13 | 14.48 | 13.58 | 12.12 | 12.54 | 12.91 | 19.38 | 12.34 | 17.21 | 21.49 | 7.26  |
| LAB  | 0.43 | 0.26  | 0.74  | 0.51  | 0.39  | 0.55  | 0.38  | 0.39  | 0.31  | 0.24  | 0.45  | 0.54  | 1     | 6.64  | 14.25 | 19.97 | 20.32 | 6.89  | 8.64  | 18.37 | 18.74 | 13.81 | 21.58 | 23.04 | 15.91 | 16.33 |
| MAD  | 0.45 | 0.28  | 0.8   | 0.58  | 0.41  | 0.56  | 0.4   | 0.4   | 0.33  | 0.26  | 0.47  | 0.56  | 0.78  | 1     | 13.77 | 19.49 | 19.83 | 4.8   | 7.2   | 17.89 | 18.26 | 11.71 | 21.1  | 22.56 | 13.82 | 15.84 |
| MON  | 0.74 | 0.56  | 0.59  | 0.33  | 0.64  | 0.77  | 0.63  | 0.64  | 0.57  | 0.5   | 0.74  | 0.78  | 0.54  | 0.55  | 1     | 11.85 | 12.2  | 13.75 | 12.29 | 10.26 | 10.62 | 19.56 | 12.28 | 14.92 | 21.66 | 6.97  |
| NAA  | 0.61 | 0.4   | 0.4   | 0.14  | 0.7   | 0.54  | 0.69  | 0.7   | 0.75  | 0.66  | 0.73  | 0.54  | 0.35  | 0.37  | 0.62  | 1     | 4.91  | 19.47 | 18.01 | 6.78  | 6.89  | 25.28 | 17.36 | 10.07 | 27.38 | 12.61 |
| NAH  | 0.6  | 0.39  | 0.39  | 0.13  | 0.69  | 0.52  | 0.68  | 0.69  | 0.74  | 0.66  | 0.72  | 0.53  | 0.34  | 0.36  | 0.6   | 0.84  | 1     | 19.82 | 18.36 | 7.14  | 7.25  | 25.63 | 17.71 | 10.3  | 27.73 | 12.96 |
| NIK  | 0.45 | 0.28  | 0.8   | 0.58  | 0.41  | 0.56  | 0.4   | 0.4   | 0.33  | 0.26  | 0.47  | 0.56  | 0.78  | 0.84  | 0.55  | 0.37  | 0.36  | 1     | 7.05  | 17.87 | 18.24 | 11.47 | 21.08 | 22.54 | 13.57 | 15.82 |
| NRM  | 0.5  | 0.33  | 0.82  | 0.57  | 0.45  | 0.61  | 0.44  | 0.45  | 0.37  | 0.3   | 0.51  | 0.61  | 0.72  | 0.77  | 0.6   | 0.42  | 0.4   | 0.77  | 1     | 16.41 | 16.78 | 12.04 | 19.62 | 21.08 | 14.14 | 14.36 |
| NVA  | 0.67 | 0.45  | 0.45  | 0.19  | 0.75  | 0.59  | 0.74  | 0.75  | 0.75  | 0.69  | 0.78  | 0.59  | 0.4   | 0.42  | 0.67  | 0.78  | 0.77  | 0.42  | 0.47  | 1     | 4.96  | 23.68 | 15.76 | 9.28  | 25.79 | 11.01 |
| NVH  | 0.65 | 0.44  | 0.44  | 0.18  | 0.74  | 0.58  | 0.73  | 0.74  | 0.76  | 0.7   | 0.77  | 0.58  | 0.39  | 0.41  | 0.66  | 0.78  | 0.76  | 0.41  | 0.46  | 0.84  | 1     | 24.05 | 16.13 | 8.87  | 26.15 | 11.38 |
| PGR  | 0.26 | 0.09  | 0.63  | 0.8   | 0.22  | 0.38  | 0.21  | 0.22  | 0.14  | 0.07  | 0.28  | 0.37  | 0.55  | 0.62  | 0.37  | 0.18  | 0.17  | 0.63  | 0.61  | 0.23  | 0.22  | 1     | 26.89 | 28.35 | 7.24  | 21.63 |
| PNG  | 0.67 | 0.75  | 0.35  | 0.09  | 0.44  | 0.59  | 0.43  | 0.44  | 0.4   | 0.32  | 0.56  | 0.6   | 0.3   | 0.32  | 0.6   | 0.44  | 0.43  | 0.32  | 0.36  | 0.49  | 0.48  | 0.13  | 1     | 20.43 | 28.99 | 9.85  |
| SAN  | 0.51 | 0.3   | 0.3   | 0.04  | 0.6   | 0.44  | 0.59  | 0.6   | 0.77  | 0.84  | 0.63  | 0.44  | 0.25  | 0.27  | 0.52  | 0.67  | 0.67  | 0.27  | 0.32  | 0.7   | 0.71  | 0.08  | 0.34  | 1     | 30.45 | 15.68 |
| TDF  | 0.19 | 0.02  | 0.56  | 0.82  | 0.15  | 0.31  | 0.14  | 0.15  | 0.07  | 0     | 0.21  | 0.3   | 0.48  | 0.55  | 0.3   | 0.11  | 0.1   | 0.56  | 0.54  | 0.16  | 0.15  | 0.77  | 0.06  | 0.01  | 1     | 23.74 |
| VA   | 0.81 | 0.64  | 0.52  | 0.26  | 0.6   | 0.76  | 0.59  | 0.6   | 0.55  | 0.48  | 0.71  | 0.76  | 0.47  | 0.49  | 0.77  | 0.59  | 0.58  | 0.49  | 0.53  | 0.64  | 0.63  | 0.3   | 0.68  | 0.49  | 0.23  | 1     |

**Table S1.** Relationship matrix. The diagonal and lower triangle entries are the pairwise estimates of shared history between groups (elements of the relationship matrix, **A**). The upper triangle entries are estimates of pairwise delta-mu squared ( $\delta\mu^2$ ) microsatellite distances. Population identifiers match those in Table 1.

## Doc. S1. Sample Overview

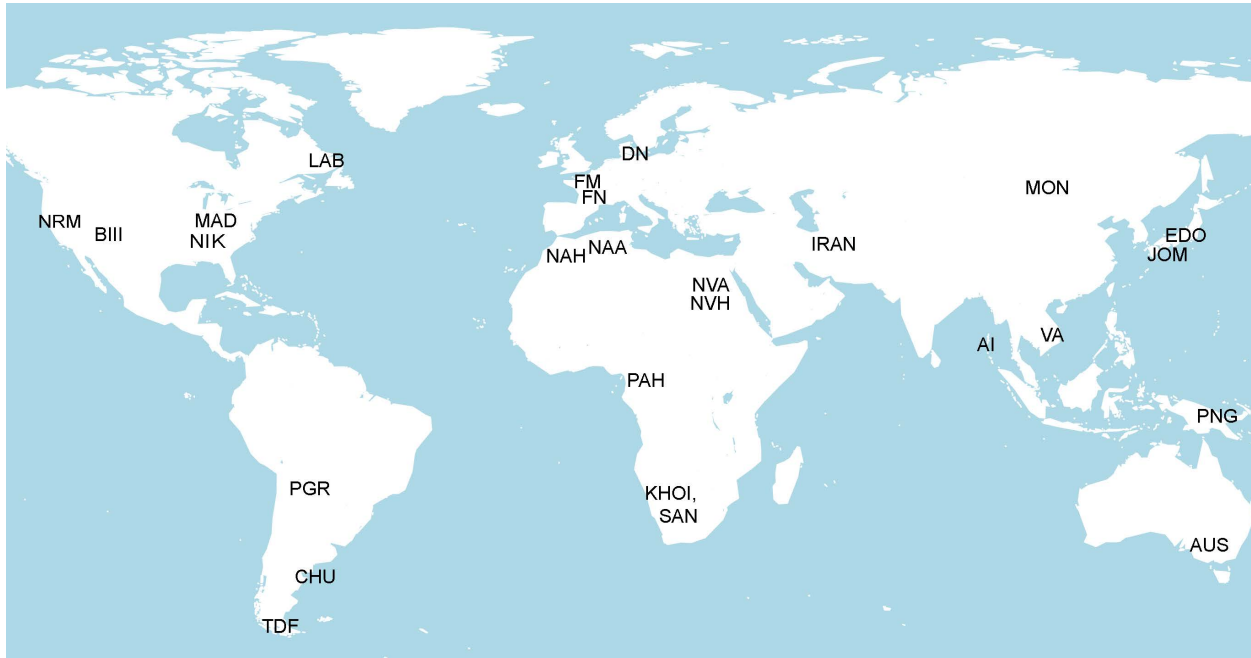

| Population            | Region    | ID   | Milk | Mush | Soft | $\mu^{\circ}\text{C}$ | C (f/m)        | J (f/m)        |
|-----------------------|-----------|------|------|------|------|-----------------------|----------------|----------------|
| San                   | Africa    | SAN  | ○    | ○    | ○    | 20.1                  | 15/13          | 12/9           |
| Khoi Khoi             | Africa    | KHOI | ●    | ○    | ●    | 22.7                  | 6/9            | 6/7            |
| Gabonese Pahuin       | Africa    | PAH  | ○    | ○    | ○    | 26.5                  | 13/8           | 2/1            |
| Jebel Sahaba          | Africa    | NVH  | ○    | ○    | ○    | 26.2                  | 0/0            | 10/10          |
| Naqada & Qeneh        | Africa    | NVA  | ●    | ●    | ●    | 24.1                  | 26/20          | 27/15          |
| Afalou & Taforalt     | Africa    | NAH  | ○    | ○    | ○    | 16.6                  | 4/3            | 11/12          |
| Protohistoric Maghreb | Africa    | NAA  | ●    | ○    | ○    | 21.8                  | 12/8           | 13/8           |
| French Neolithic      | Europe    | FN   | ●    | ●    | ●    | 9.9                   | 13/17          | 12/12          |
| French Mesolithic     | Europe    | FM   | ○    | ○    | ○    | 11.3                  | 2/0            | 6/3            |
| Danish Neolithic      | Europe    | DN   | ●    | ●    | ●    | 7.7                   | 13/16          | 10/14          |
| Tepe Hissar, Hasanlu  | Asia      | IRAN | ○    | ●    | ●    | 15.3                  | 15/13          | 9/17           |
| Andaman Islands       | Asia      | AI   | ○    | ○    | ○    | 26.6                  | 10/10          | 6/6            |
| Man Bac               | Asia      | VA   | ○    | ●    | ●    | 24.2                  | 5/2            | 8/9            |
| Edo                   | Asia      | EDO  | ○    | ●    | ●    | 15.1                  | 15/14          | 15/12          |
| Jomon                 | Asia      | JOM  | ○    | ○    | ○    | 13.7                  | 2/8            | 11/17          |
| Mongolian             | Asia      | MON  | ●    | ○    | ●    | -1.1                  | 14/15          | 11/14          |
| Papua New Guinea      | Oceania   | PNG  | ○    | ○    | ○    | 25.9                  | 13/14          | 14/14          |
| Australian            | Oceania   | AUS  | ○    | ○    | ○    | 14.3                  | 13/14          | 13/13          |
| Ryan Mound            | N America | NRM  | ○    | ○    | ○    | 15.1                  | 11/16          | 14/18          |
| Basketmaker III       | N America | BIII | ○    | ●    | ●    | 5.5                   | 14/9           | 11/11          |
| Indian Knoll          | N America | NIK  | ○    | ○    | ○    | 13.6                  | 12/14          | 10/16          |
| Madisonville          | N America | MAD  | ○    | ●    | ●    | 11.7                  | 13/9           | 11/10          |
| Labrador Inuit        | N America | LAB  | ○    | ○    | ○    | -1.1                  | 15/14          | 12/13          |
| Pampa Grande          | S America | PGR  | ○    | ●    | ●    | 20.4                  | 9/5            | 0/0            |
| Chubut Valley         | S America | CHU  | ○    | ○    | ○    | 13.4                  | 8/8            | 0/0            |
| Fuegians              | S America | TDF  | ○    | ○    | ○    | 3.6                   | 15/12          | 11/8           |
|                       |           |      |      |      |      | <b>Total</b>          | <b>288/271</b> | <b>265/269</b> |

Diet variables are Milk, Mush, and Soft. Milk = dairying. Mush = cereal domestication. *Soft* = domesticated cereals and/or dairying.  $\mu^{\circ}\text{C}$  = mean annual temperature. *C (f/m)* and *J (f/m)* are, respectively, crania and mandible samples sizes for females (*f*) and males (*m*). The remaining pages provide additional details about the sampled populations.

## SUBSISTENCE PROFILES

The materials below provide a brief summary for the evidentiary basis for the subsistence variable assignments.

### *San*

The San are a foraging culture from southern Africa. Subsistence varies among San groups, most prominently based on whether mongongo nuts are available in a respective region. Still, the proportion of animal protein in the diet is small and reasonably similar across San groups (1-3).

### *Khoi Khoi*

The Khoi Khoi are coastal nomadic pastoralists who likely descended from San with the introduction of Middle Eastern livestock species by migrants or traders (2, 4). In summers, they largely subsist upon milk and butter from their herds (4). Foraging and hunting also contribute meaningfully to total caloric consumption (4, 5).

### *Gabonese Pahuin*

There are few sources of data available on the subsistence of the Gabonese Pahuin. They are a Bantu speaking people. It appears most individuals maintain an agrarian lifestyle. Staple items are manioc, some maize, plaintains, yams, and groundnuts. Livestock is limited to small animals. However, the main protein source is bushmeat (6). Despite the presence of maize in the Pahuin diet, we have scored the population with a "0" in the cereals binary category (Mush). The diet appears to be highly diversified, not maize intensive.

### *Jebel Sahaba*

The Jebel Sahaba skeletal population is considered to have been part of the Qadan culture, and dates to around 12,000 BP. The site is located just north of the Second Cataract of the Nile, on the eastern shore. More than half of the burials at the site show evidence of a violent death (7).

Late Paleolithic and Epipaleolithic subsistence along the Nile was based on hunting and foraging (8). Food items exploited included tubers and other plants, fish, shellfish, waterfowl, palm nuts, hartebeest, gazelle, wild cattle, and hippopotamus (8-13). Grindstones, sickle blades, and other tools suggesting extensive plant use are also present (7, 11, 12).

### *Naqada and Qeneh, Egypt*

Naqada and Qeneh are both part of the predynastic Chalcolithic of Egypt (11, 14). The sites are just a few kilometers apart from each other on the Nile River in Upper Egypt, about 60 km north of Luxor (15, 16).

## SI APPENDIX

Naqada was inhabited for about from about 4400-3000 BCE. Aspects of subsistence and economy changed across these periods. However, throughout, diet included substantial inputs from domesticated plants, including cereals (wheat, barley, e.g.), domesticated animals (cows, pigs, goats, sheep), and wild plant and animal resources (11, 17, 18). Archaeological evidence for dairying is strong. However, isotopic data does not always support high levels of meat or dairy consumption (compare: 19, 20). It has been suggested that these isotope results may be peculiar to the animal samples and environmental conditions in the Nile Valley, rather than reflective of subsistence behavior, because a literal reading of the data would suggest that ancient Egyptians neither ate the livestock they raised nor drank the milk their livestock produced (19). This is extremely unlikely. Following the lead of others (19, 20), for purposes of this study, the Qeneh and Naqada skeletal sample is regarded as a dairying one.

### *Afalou & Taforalt*

The sample is primarily from Afalou bou Rhummel and Taforalt, with small contributions from Aïn Dokkara, Aïn Meterchen, and Mechta el Arbi. These are Iberomaurusian and Capsian sites with a broad based hunting and foraging diet (21-23).

### *Neolithic and Protohistoric Maghreb*

The sample is Neolithic and protohistoric from Algeria and Tunisia. Pastoralism is widespread in the region during this time (24, 25), including among the ancient Berber, which form part of the sample. While there is some evidence for cereal agriculture in the Maghreb during this timeframe (26, 27), pastoralism supplemented by foraging appears to be the primary mode of subsistence (27, 28).

### *French Late Mesolithic*

The remains come from four sites: Teviec, Hoedic, Montclus, and Gramat. Montclus is located on the Mediterranean Sea. The remaining sites are along the Atlantic coast. The Late Mesolithic animal resources consisted of a mix of larger mammals (red deer, boar, e.g.), smaller game, marine resources, and small package items like snails (29-31). The extent of plant exploitation is debated, with estimates ranging from diets that include as much as 80% vegetal matter to as little as little as 20% (31-33). Teviec and Hoedic appear to be marine intensive sites (34, 35).

### *French Neolithic*

The remains come mostly from sites in Northern France. None appear to be from dates earlier than the Late Bandkeramik period (4500-4000 BC: 36), though dates could not be obtained in many cases. Animal protein was primarily derived from domesticated cow, pig, and caprids (37). Plant domesticates were present from the early Neolithic in France, though the number of cultivated species was low; major domesticates included cereals and pulses (38, 39). There is substantial evidence for intensive dairying, buttressed by high present-day frequencies of lactase persistence (40-42).

## SI APPENDIX

### *Danish Neolithic*

The Danish Neolithic remains in this sample come from many sites, both inland and coastal. Not all of these sites could be confidently assigned to a specific culture or subculture. Much of the Danish Neolithic subsistence characterization below is based on evidence from the Funnel Beaker culture. However, for the diet categories considered in this study, diets from all periods appear to be consistent with one another.

Cow and pig were the chief domesticated animals of the Danish Neolithic. Cereals (wheat, emmer, einkorn) were intensively exploited (43). Dairy items were a subsistence staple (41, 44). Nevertheless, hunting and fishing continued in the Neolithic, perhaps on a seasonal basis (45-47). There is also evidence for continued exploitation of shellfish (48).

### *Tepe Hissar and Hasanlu, Iran*

Tepe Hissar and Tepe Hasanlu are Bronze Age urban sites in northeastern Iran (49, 50). Much less is known of the subsistence economy at Hasanlu (51). Hissar was occupied as early as 7000 BP, with the Bronze Age period beginning after 5000 BP. Cereals make up the largest component of plant remains at Hissar, followed by legumes and fruits (52). Nuts (almonds and pistachios) also appear to have been an important part of the diet (51).

While zooarchaeological evidence for animal domestication at Hissar and Hasanlu is not dense, there are several reasons to suspect livestock and dairying were important parts of subsistence. The majority of zooarchaeological remains at Hissar are domesticates (53). Nomadic pastoralism (cattle, sheep, goats) was extremely important in the surrounding regions well before the Bronze Age (51, 54, 55). The presence of figurines and other cultural representations of domesticated animals (as well as wild animals) at Hissar and Hasanlu (53, 56) further supports the inference that these animals were important dietary resources. Animal domestication and dairying will therefore be inferred as components of the Hissar and Hasanlu subsistence economy.

### *Andaman Islands*

The Andaman Islands are a small archipelago in the Bay of Bengal. Most Andaman Islands tribes had a diverse foraging subsistence that included roots, tubers, fruit, vegetables and a heavy reliance on maritime and intertidal resources (57, 58). While the Andamanese began to raise pigs after contact with seafaring traders around 2 ka, they did not adopt farming (59 p. 35). Pigs proliferated on the main island, and were hunted rather than raised (58).

### *Neolithic Vietnam*

The skeletal materials come from the Man Bac site in Northern Vietnam, dated 3800-3500 BP. Man Bac is most likely a Neolithic-Bronze Age transitional site (60). The site provides extensive evidence for agriculture, as well as hunting and marine resource exploitation (60, 61). By far the most abundant mammal taxon in the faunal assemblage is pig, nearly all of which are thought to have been domesticated (62). Man Bac lacks direct evidence

## SI APPENDIX

for rice production (63). However, the estimated dates for Man Bac are subsequent to the spread of rice cultivation in Vietnam (64, 65). Further, cultural artefacts associated with the burial site have close affinities with the contemporary Phung Nguyen culture period, which strongly suggests rice domestication (63). Rice exploitation is therefore presumed for this study.

There is no evidence for dairying. Further, modern Vietnam has among the lowest frequencies of lactase persistence in the world (66).

### *Edo, Japan*

The preindustrial Edo period ran from the 17<sup>th</sup> through the middle of the 19<sup>th</sup> century in Japan. All specimens in the sample are from the Ikenohata Shichikencho burial site, near Tokyo. Diets differed substantially among the social classes in the Edo period (67). Thanks to the assistance of K. Sakaue, we were able to limit the skeletal sample to the remains of townspeople (lower class). The food staples of Edo townspeople were soybeans, rice, and vegetables; meat was consumed in lower quantities or irregularly (67, 68). There is no evidence that dairy was an important part of the diet during this period.

### *Jomon*

Jomon are Japanese aboriginal hunter-gatherers. Primary resources are medium-sized to large terrestrial herbivores, marine mammals, fish, nuts, seeds, fruits, roots, and green plant foods, and intertidal zone resources, most notably shellfish (69). After the early Jomon period, there is evidence for the exploitation of a few domesticated plants (rice, millet, e.g.), but not for extensive reliance on domesticates (70).

### *Mongolian*

The Mongolian climate and landscape is not favorable for plant agriculture. Mongolian diets are largely dependent on traditional nomadic pastoralist animal products: meat, fat, entrails, dairy (71-73).

### *Tolai, New Britain*

Tolai inhabited New Britain, part of Melanesia. The Tolai are part-time horticulturalists, raising coconuts, banana, yams, taro, sweet potatoes, and sugar cane, among other items (74). Fish and turtles were important for animal protein (74-76). There is no evidence for dairying or intensive exploitation of cereals.

### *Southern Australia*

Foraged diets among the aborigines of South and southeastern Australia were diverse, including a range of fruits, vegetables, and terrestrial, aquatic and marine protein (77, 78).

## SI APPENDIX

### *Ryan Mound, California*

Ryan Mound (CA-ALA-329) is a shellmound located on the southeastern shore of the San Francisco Bay. Radiocarbon dating indicates occupation of the site from about 2200-200 BP (79). Isotopic, artefactual, and zooarchaeological evidence support mixed marine and terrestrial foraging strategies (80, 81).

### *Basketmaker III, Colorado*

Multiple lines of evidence, including coprolites (82), stable isotopes (83, 84), and large mano size (85), suggest a heavy reliance on maize agriculture. Estimates run from 50% maize diet (86), to upwards of 80% (83, 84). Basketmaker III groups continued to exploit wild growing plants (e.g., pinyon nuts, prickly pear cactus) and animals (87). There is no evidence for dairying.

### *Indian Knoll, Kentucky*

Indian Knoll is an Archaic hunter-gatherer site in Kentucky. The primary subsistence items were deer, shellfish, nuts, and small game. Deer is by far the most heavily represented terrestrial mammal in the zooarchaeological materials (88). Exploitation of plant resources became much more pronounced in the Middle and Late Archaic, including nuts, squash, and seeds (89-92).

### *Madisonville Fort Ancient*

The Madisonville, Ohio site is an agricultural group from the (Western) Fort Ancient period. Fort Ancient peoples primarily cultivated corn, but also beans, squash and other domesticates (93). Madisonville is a late Fort Ancient site. There is evidence that maize consumption was lower during this time period (94). Based on isotope data, it is likely that slightly more than 50% of dietary protein came from maize in the Madisonville diet (94, 95). For purposes of this study, that is sufficient to classify the Madisonville sample as reliant on domesticated cereals. There is no evidence for dairying.

### *Labrador Inuit*

Atlantic coast nitrogen and carbon isotope values for North American north Atlantic coast hunter-gatherers support either marine top carnivore or terrestrial top carnivore, depending on group (34, 96). Arctic foragers consumed plant foods where available, particularly berries (97). However, animal protein and fat made up the vast majority of Arctic forager subsistence.

### *Pampa Grande, Argentina*

The Pampa Grande sample comes from multiple sites in northwestern Argentina, all dating to around 1500 BP. The group was heavily dependent on high-carbohydrate domesticates for their subsistence (98 and citations therein). There is no evidence for dairying.



## SI APPENDIX

### *Chubut Valley, Argentina*

Chubut Valley is a hunter-gatherer skeletal sample. The site dates to about 1500–200 years BP. The diet was heavily dependent on hunting guanaco and other animals as well as gathering some wild plants (98 and citations therein).

### *Tierra del Fuego*

The several foraging groups that occupy the Fuegian archipelago will be regarded as a single population for this study. There are however, some differences in subsistence behavior and biology among the groups. The Ona intensively exploited guanaco, while the Yámana focused on maritime resources (99). The Ona are generally larger bodied than the Yámana (100). Nevertheless, all groups were heavily dependent on meat for survival.

## REFERENCES

1. Lee RB (1966) Subsistence Ecology of the !Kung Bushmen. Doctor of Philosophy Dissertation (University of Michigan, Ann Arbor).
2. Tanaka J (2014) *The Bushmen: A Half-Century Chronicle of Transformations in Hunter-Gatherer Life and Ecology* (Kyoto University Press, Trans Pacific Press, Kyoto, Victoria); trans Sato M.
3. Tanaka J (1976) Subsistence ecology of central Kalahari San. *Kalahari Hunter-Gatherers*, eds Lee RB & DeVore I (Harvard University Press, Cambridge), pp 98-119.
4. Schapera I (1951) *The Khoisan Peoples of South Africa: Bushmen and Hottentots* (Routledge & Kegan Paul Ltd, London).
5. Engelbrecht JA (1936) *The Korana: an account of their customs and their history, with texts* (M. Miller, limited).
6. Van der Veen L (2007) The origins of the Fang: language, culture and genes. in *Center for Language and Cognition Linguistics Colloquium* (Groningen).
7. Midant-Reynes B (2000) The Naqada period (4000–3200 BC). *The Oxford History of Ancient Egypt*, ed Shaw I (Oxford University Press, New York), pp 44-60.
8. Wendorf F (2001) Late Paleolithic Egypt. *Encyclopedia of Prehistory: Africa*, eds Peregrine PN & Ember M (Springer, New York), Vol 1, pp 220-238.
9. Clark J (1976) Prehistoric populations and pressures favoring plant domestication in Africa. *Origins of African Plant Domestication*, ed Harlan JR (Mouton & Co, The Netherlands), pp 67-106.
10. Marks AE, Peters J, & Van Neer W (1987) Late Pleistocene and early Holocene occupations in the upper Atbara River Valley, Sudan. *Prehistory of Arid North Africa: Essays in Honor of Fred Wendorf*, ed Close AE (Southern Methodist University Press, Dallas).
11. Hassan FA (1988) The Predynastic of Egypt. *J World Prehist* 2(2):135-185.
12. Wenke RJ, Long JE, & Buck PE (1988) Epipaleolithic and Neolithic subsistence and settlement in the Fayyum Oasis of Egypt. *J Field Archaeol* 15(1):29-51.
13. Churcher C (1972) Late Pleistocene Vertebrates from Archaeological Sites in the Plain of Kom Ombo, Upper Egypt. In *Life Sciences Contributions* (Royal Ontario Museum, Ontario).
14. Kohler C (2001) Lower Egypt Predynastic. *Encyclopedia of Prehistory: Africa*, eds Peregrine PN & Ember M (Springer, New York), Vol 1, pp 220-238.
15. Landauer CA (1962) A factor analysis of the facial skeleton. *Hum Biol* 34(4):239-253.
16. Raxter MH (2011) Egyptian body size: A regional and worldwide comparison. Doctoral dissertation (University of South Florida).
17. Nikita E, Mattingly D, & Lahr MM (2014) Dental indicators of adaptation in the Sahara Desert during the Late Holocene. *HOMO - J Comp Hum Biol* 65(5):381-399.

18. Gamza T & Irish J (2012) A comparison of archaeological and dental evidence to determine diet at a predynastic Egyptian site. *Int J Osteoarchaeol* 22(4):398-408.
19. Thompson AH, Richards MP, Shortland A, & Zakrzewski SR (2005) Isotopic palaeodiet studies of Ancient Egyptian fauna and humans. *J Archaeol Sci* 32(3):451-463.
20. Touzeau A, *et al.* (2014) Diet of ancient Egyptians inferred from stable isotope systematics. *J Archaeol Sci* 46:114-124.
21. Lubell D (2001) Late Pleistocene-Early Holocene Maghreb. *Encyclopedia of Prehistory: Africa*, eds Peregrine PN & Ember M (Springer, New York), Vol 1, pp 129-149.
22. Barton N & Bouzouggar A (2013) Hunter-Gatherers of the Maghreb 25,000-6,000 Years Ago. in *The Oxford Handbook of African Archaeology*, eds Mitchell P & Lane PJ (Oxford University Press, Oxford).
23. Taylor VK, *et al.* (2011) The Epipalaeolithic (Iberomaurusian) at Grotte des Pigeons (Taforalt), Morocco: A preliminary study of the land Mollusca. *Quat Int* 244(1):5-14.
24. Merzoug S, Kherbouche F, Sehil N, Chelli R, & Hachi S (2016) Faunal analysis of the Neolithic units from the Gueldaman Cave GLD1 (Akbou, Algeria) and the shift in sheep/goat husbandry. *Quat Int* 410, Part A:43-49.
25. Mulazzani S, *et al.* (2016) The emergence of the Neolithic in North Africa: A new model for the Eastern Maghreb. *Quat Int* 410, Part A:123-143.
26. Ballouche A & Marinval P (2004) At the origins of agriculture in the Maghreb Palynological and carpological data on the early Neolithic of Northern Morocco.
27. Wyrwoll T (2001) North African Protohistoric. *Encyclopedia of Prehistory: Africa*, eds Peregrine PN & Ember M (Springer, New York), Vol 1, pp 220-238.
28. Roubet C (2001) Neolithic of Capsian. *Encyclopedia of Prehistory: Africa*, eds Peregrine PN & Ember M (Springer, New York), Vol 1, pp 197-219.
29. Jochim M (2011) The Mesolithic. *European Prehistory*, (Springer), pp 125-151.
30. Rillardon M & Brugal J-P (2014) What about the Broad Spectrum Revolution? Subsistence strategy of hunter-gatherers in Southeast France between 20 and 8 ka BP. *Quat Int* 337(0):129-153.
31. Price TD (1987) The Mesolithic of Western Europe. *J World Prehist* 1(3):225-305.
32. Clarke D (1976) Mesolithic Europe: The economic basis. *Problems in Social and Economic Anthropology*, eds Sieveking G, Longworth I, & Wilson K (Duckworth, London), pp 449-482.
33. Zvelebil M (1994) Plant use in the Mesolithic and its role in the transition to farming. *Proceedings of the prehistoric society* (Cambridge Univ Press), pp 35-74.
34. Richards MP & Hedges REM (1999) Stable Isotope Evidence for Similarities in the Types of Marine Foods Used by Late Mesolithic Humans at Sites Along the Atlantic Coast of Europe. *Journal of Archaeological Science* 26(6):717-722.
35. Schulting RJ & Richards MP (2001) Dating Women and Becoming Farmers: New Palaeodietary and AMS Dating Evidence from the Breton Mesolithic Cemeteries of Tévéc and Hoëdic. *J Anthropol Archaeol* 20(3):314-344.
36. Ilett M (1983) The early Neolithic of northeastern France. *Ancient France: Neolithic societies and their landscapes, 6000-2000 BC*, ed Scarre C (Edinburgh University Press, Edinburgh), pp 6-33.
37. Burkill M (1983) The Middle Neolithic of the Paris Basin and north-eastern France. *Ancient France: Neolithic societies and their landscapes, 6000-2000 BC*, ed Scarre C (Edinburgh University Press, Edinburgh), pp 34-61.
38. Tresset A (2015) Moving Animals and Plants in the Early Neolithic of North-western Europe. *The Oxford Handbook of Neolithic Europe*, eds Fowler C, Harding J, & Hofman D (Oxford University Press, Oxford), pp 121-138.
39. Bakels C (1999) Archaeobotanical investigations in the Aisne valley, northern France, from the Neolithic up to the early Middle Ages. *Veg hist archaeobot* 8(1-2):71-77.
40. Lacan M, *et al.* (2011) Ancient DNA reveals male diffusion through the Neolithic Mediterranean route. *Proc Natl Acad Sci U S A* 108(24):9788-9791.
41. Leonardi M, Gerbault P, Thomas MG, & Burger J (2012) The evolution of lactase persistence in Europe. A synthesis of archaeological and genetic evidence. *Int Dairy J* 22(2):88-97.
42. Cramp LJE, *et al.* (2014) Immediate replacement of fishing with dairying by the earliest farmers of the northeast Atlantic archipelagos. *Proc R Soc B Biol Sci* 281(1780).

43. Iversen J (2002/1967) Stone Age Man's Transformation and Exploitation of the Primeval Forest. *The Neolithisation of Denmark: 150 years of debate*, eds Fischer A & Kristiansen K (JR Collis), pp 196-209.
44. Ingram CJE, Mulcare CA, Itan Y, Thomas MG, & Swallow DM (2009) Lactose digestion and the evolutionary genetics of lactase persistence. *Hum Genet* 124(6):579-591.
45. Price TD (2015) *Ancient Scandinavia: An archaeological history from the first humans to the Vikings* (Oxford University Press, Oxford).
46. Fischer A, *et al.* (2007) Coast–inland mobility and diet in the Danish Mesolithic and Neolithic: evidence from stable isotope values of humans and dogs. *J Archaeol Sci* 34(12):2125-2150.
47. Skaarup J (2002/1973) The relationship between the south Scandinavian Funnel Beaker Culture and the Ertebølle Culture. *The Neolithisation of Denmark: 150 years of debate*, eds Fischer A & Kristiansen K (JR Collis), pp 212-217.
48. Rowley-Conwy P (2002/1984) The laziness of the short-distance hunter: the origins of agriculture in western Denmark. *The Neolithisation of Denmark: 150 years of debate*, eds Fischer A & Kristiansen K (JR Collis), pp 272-287.
49. Thornton CP (2009) The Chalcolithic and early Bronze Age metallurgy of Tepe Hissar, northeast Iran: A challenge to the 'Levantine Paradigm'. Doctoral dissertation (University of Pennsylvania).
50. Tosi M, Shahmirzadi S, & Joyenda M (1996) The Bronze Age in Iran and Afghanistan. *History of civilizations of Central Asia*, eds Dani A & Masson V (UNESCO Publishing, Paris), Vol 1, pp 191-224.
51. Danti MD (2013) *Hasanlu V: The late Bronze Age and Iron I periods* (University of Pennsylvania Museum of Archaeology and Anthropology, Philadelphia).
52. Costantini L & Dyson Jr RH (1990) The ancient agriculture of the Damghan Plain: the archaeobotanical evidence from Tepe Hissar. *Economy and Settlement in the Near East: Analyses of Ancient Sites and Materials*, ed Miller NF (Museum Applied Science Center for Archaeology (MASCA), Philadelphia), Vol 7, p 47.
53. Mashkour M (1998) Faunal remains from Tepe Hissar (Iran). in *Proceedings of XIII International Congress of Prehistoric and Protohistoric Sciences, Forli, Italia, September 1996 I* (Forli A.B.A.C.O, Forli, Italy), pp 543-551.
54. Naderi S, *et al.* (2008) The goat domestication process inferred from large-scale mitochondrial DNA analysis of wild and domestic individuals. *Proc Natl Acad Sci U S A* 105(46):17659-17664.
55. Henrickson EF (1985) The early development of pastoralism in the Central Zagros Highlands (Luristan). *Iranica Antiqua* 20:1.
56. Haji S & Chehri M (2013) Animal figures of Sasanian stucco in Tepe Hissar. *J Agric Environ Sci* 2(2):32-45.
57. Radcliffe-Brown A (1922) *The Andaman Islanders* (Cambridge University Press).
58. Cipriani L (1966) *The Andaman Islanders* (Frederick A. Praeger, New York); trans Cox DT & Cole L.
59. Bellwood PS (2005) *First Farmers: The Origins of Agricultural Societies* (Blackwell Publishing, Malden).
60. Matsumura H, *et al.* (2008) Morphometric affinity of the late Neolithic human remains from Man Bac, Ninh Binh Province, Vietnam: key skeletons with which to debate the 'two layer' hypothesis. *Anthropol Sci* 116(2):135-148.
61. Toizumi T, Nguyen KT, & Sawada J (2011) Fish remains at Man Bac. *Man Bac: The excavation of a Neolithic Site in Northern Vietnam*, eds Oxenham MF, Matsumura H, & Nguyen KT (Australian National University E Press, Australia), pp 117-126.
62. Sawada J, Nguyen KT, & Nguyen A (2011) Faunal remains at Man Bac. *Man Bac: The excavation of a Neolithic Site in Northern Vietnam*, eds Oxenham MF, Matsumura H, & Nguyen KT (Australian National University E Press, Australia), pp 105-116.
63. Matsumura H & Oxenham MF (2011) Introduction: Man Bac Biological Research Objectives *Man Bac: The excavation of a Neolithic Site in Northern Vietnam*, eds Oxenham MF, Matsumura H, & Nguyen KT (Australian National University E Press, Australia), pp 1-8.
64. Bellwood P, *et al.* (1992) New Dates for Prehistoric Asian Rice. *Asian Perspect* 31(2):161-170.
65. Nguyen X (1998) Rice remains from various archaeological sites in North and South Vietnam. *SE Asian Archaeol 1996*, eds Klokke M & de Bruijn T (University of Hull, Centre for Asian Studies, Hull), pp 27-40.
66. Itan Y, Jones BL, Ingram CJ, Swallow DM, & Thomas MG (2010) A worldwide correlation of lactase persistence phenotype and genotypes. *BMC Evol Biol* 10(1):1.

67. Tsutaya T, Nagaoka T, Sawada J, Hirata K, & Yoneda M (2014) Stable isotopic reconstructions of adult diets and infant feeding practices during urbanization of the city of Edo in 17th century Japan. *Am J Phys Anthropol* 153(4):559-569.
68. Hanley SB (1997) *Everyday things in premodern Japan: the hidden legacy of material culture* (Univ of California Press, Berkeley).
69. Akazawa T (1986) Regional variation in procurement systems of Jomon. *Prehistoric hunter-gatherers in Japan: new research methods*, eds Akazawa T & Aikens CM (University of Tokyo Press, Tokyo), pp 73-89.
70. Habu J (2004) *Ancient Jomon of Japan* (Cambridge University Press, Cambridge).
71. Thompson AH, *et al.* (2010) Stable isotope analysis of modern human hair collected from Asia (China, India, Mongolia, and Pakistan). *Am J Phys Anthropol* 141(3):440-451.
72. Speedy AW (2003) Global Production and Consumption of Animal Source Foods. *J Nutr* 133(11):4048S-4053S.
73. Machicek ML & Zubova AV (2012) Dental Wear Patterns and Subsistence Activities in Early Nomadic Pastoralist Communities of the Central Asian Steppes. *Archaeol, Ethnol and Anthropol of Eurasia* 40(3):149-157.
74. Epstein JS (1968) *Capitalism, primitive and modern: some aspects of Tolai economic growth* (Manchester University Press, Manchester, UK).
75. Neumann K (1992) *Not the way it was: constructing the Tolai past* (University of Hawaii Press, Honolulu).
76. Parkinson R (1999) *Thirty years in the south seas* (University of Hawai'i Press, Honolulu); trans Dennison J.
77. Pate FD (1998) Bone collagen stable nitrogen and carbon isotopes as indicators of past human diet and landscape use in southeastern South Australia. *Aust Archaeol* 46:23-29.
78. Keen I (2004) *Aboriginal Economy & Society: Australia at the threshold of colonisation* (Oxford University Press, USA).
79. Leventhal AM (1993) A reinterpretation of some San Francisco Bay Mound Sites: A view from the mortuary complex from prehistoric site CA-ALA-329, the Ryan Mound. Masters (San Jose State University, Ann Arbor).
80. Bartelink E (2009) Late Holocene Dietary Change in the San Francisco Bay Area. *Calif Archaeol* 1(2):227-251.
81. Eerkens JW, Mackie M, & Bartelink EJ (2013) Brackish water foraging: isotopic landscapes and dietary reconstruction in Suisun Marsh, Central California. *J Archaeol Sci* 40(8):3270-3281.
82. Stiger MA (1979) Mesa Verde subsistence patterns from Basketmaker to Pueblo III. *Kiva* 44(2/3):133-144.
83. Decker KW & Tieszen LL (1989) Isotopic reconstruction of Mesa Verde diet from Basketmaker III to Pueblo III. *Kiva* 55(1):33-46.
84. Coltrain JB, Janetski JC, & Carlyle SW (2007) The stable-and radio-isotope chemistry of Western Basketmaker burials: Implications for early Puebloan diets and origins. *Am Antiq* 72(2):301-321.
85. Hard RJ, Mauldin RP, & Raymond GR (1996) Mano size, stable carbon isotope ratios, and macrobotanical remains as multiple lines of evidence of maize dependence in the American Southwest. *J Archaeol Method and Theory* 3(3):253-318.
86. Schiffer MB (1972) Cultural laws and the reconstruction of past lifeways. *Kiva* 37(3):148-157.
87. Badenhorst S & Driver JC (2009) Faunal changes in farming communities from Basketmaker II to Pueblo III (A.D. 1–1300) in the San Juan Basin of the American Southwest. *J Archaeol Sci* 36(9):1832-1841.
88. Webb WS (1974) *Indian Knoll* (University of Tennessee Press, Knoxville).
89. Chapman CA (1995) Primate seed dispersal: Coevolution and conservation implications. *Evol Anthropol* 4:74-82.
90. Chapman J & Watson PJ (1993) The Archaic period and the flotation revolution. *Foraging and farming in the eastern woodlands*, ed Scarry CM (University Press of Florida, Gainesville), pp 27-38.
91. Price TD (1985) Late Archaic subsistence in the Midwestern United States. *J Hum Evol* 14(5):449-459.
92. Crawford GW (1982) Late Archaic plant remains from west-central Kentucky: A summary. *Midcontinental J Archaeol* 7(2):205-224.
93. Drooker PB (1997) *The View from Madisonville: Protohistoric Western Fort Ancient Interaction Patterns* (University of Michigan, Ann Arbor).
94. Cook RA & Price TD (2015) Maize, mounds, and the movement of people: isotope analysis of a Mississippian/Fort Ancient region. *J Archaeol Sci* 61(0):112-128.

SI APPENDIX

95. Cook RA & Schurr MR (2009) Eating between the lines: Mississippian migration and stable carbon isotope variation in Fort Ancient populations. *Am Anthropol* 111(3):344-359.
96. Coltrain JB (2009) Sealing, whaling and caribou revisited: additional insights from the skeletal isotope chemistry of eastern Arctic foragers. *J Archaeol Sci* 36(3):764-775.
97. Zutter C (2009) Paleoethnobotanical Contributions to 18th-Century Inuit Economy: An Example from Uivak, Labrador. *J North Atlantic* 2(sp1):23-32.
98. Barbeito-Andres J, Pucciarelli HM, & Sardi ML (2011) An ontogenetic approach to facial variation in three Native American populations. *HOMO-J Compar Hum Biol* 62(1):56-67.
99. Lothrop SK (1928) *The Indians of Tierra del Fuego* (Lancaster Press, Lancaster).
100. Hooton EA (1928) Note on the anthropometric characters of the Yahgan and the Ona. *The Indians of Tierra del Fuego*, (Lancaster Press, Lancaster), pp 35-58.
